# Supplementary material
Source: HighWire-hosted journal article supplement (https://bmjopen.bmj.com/content/9/7/e030290)
Supplement: inline-supplementary-material-3 [file inline-supplementary-material-3.pdf]

1 **Supplementary File 3- Full details of search strategy**

2 Full details are available in the published protocol<sup>37</sup> but are detailed briefly below.

3 **Search Strategy**

4 MEDLINE, Embase, PsycINFO (via OVID), Cochrane library and CINAHL databases were searched from  
5 inception to 05/09/2018. We used a validated qualitative search filter<sup>(121)</sup> and population specific search  
6 terms. The search strategy that was used in MEDLINE is displayed in Appendix 1. The OpenGrey database  
7 and specialist websites (HEART UK, British Heart Foundation, The FH Foundation and The Simon Broome  
8 Register) were also searched up until 05/09/2018. The reference lists of the 50 papers taken to the full text  
9 screening stage were also hand searched. When only an abstract was available, the lead author was  
10 conducted in attempt to retrieve the full text. When contacting the lead authors of the included papers as part  
11 of the quality appraisal stage, enquiries were also made about any unpublished work.

12 **Appendix 1: Search Strategy used in MEDLINE 05/09/2018**

13 1. (familial adj1 hypercholesterolemia).ti,ab, kf.

14 2. (familial adj1 hypercholesterolaemia).ti,ab, kf.

15 3. (inherit\* adj1 high adj1 cholesterol).ti,ab, kf.

16 4. \*Hypercholesterolemia/ge [Genetics]

17 5. 1 or 2 or 3 or 4

18 6. interview\*.ti,ab.

19 7. exp. Interviews/

20 8. experience\*.tw.

21 9. qualitative.ti,ab.

22 10. 6 or 7 or 8 or 9

23 11. 5 and 10

24

25

26

27
